# Supplementary material for: Robust genome editing via modRNA-based Cas9 or base editor in human pluripotent stem cells
Source: PubMed Central journal article supplement (PMC9499999; doi:10.1016/j.crmeth.2022.100290), 2022-09-07

**Cell Reports Methods, Volume 2**

**Supplemental information**

**Robust genome editing via  
modRNA-based Cas9 or base editor  
in human pluripotent stem cells**

**Tahir Haideri, Alessandro Howells, Yuqian Jiang, Jian Yang, Xiaoping Bao, and Xiaojun  
Lance Lian**

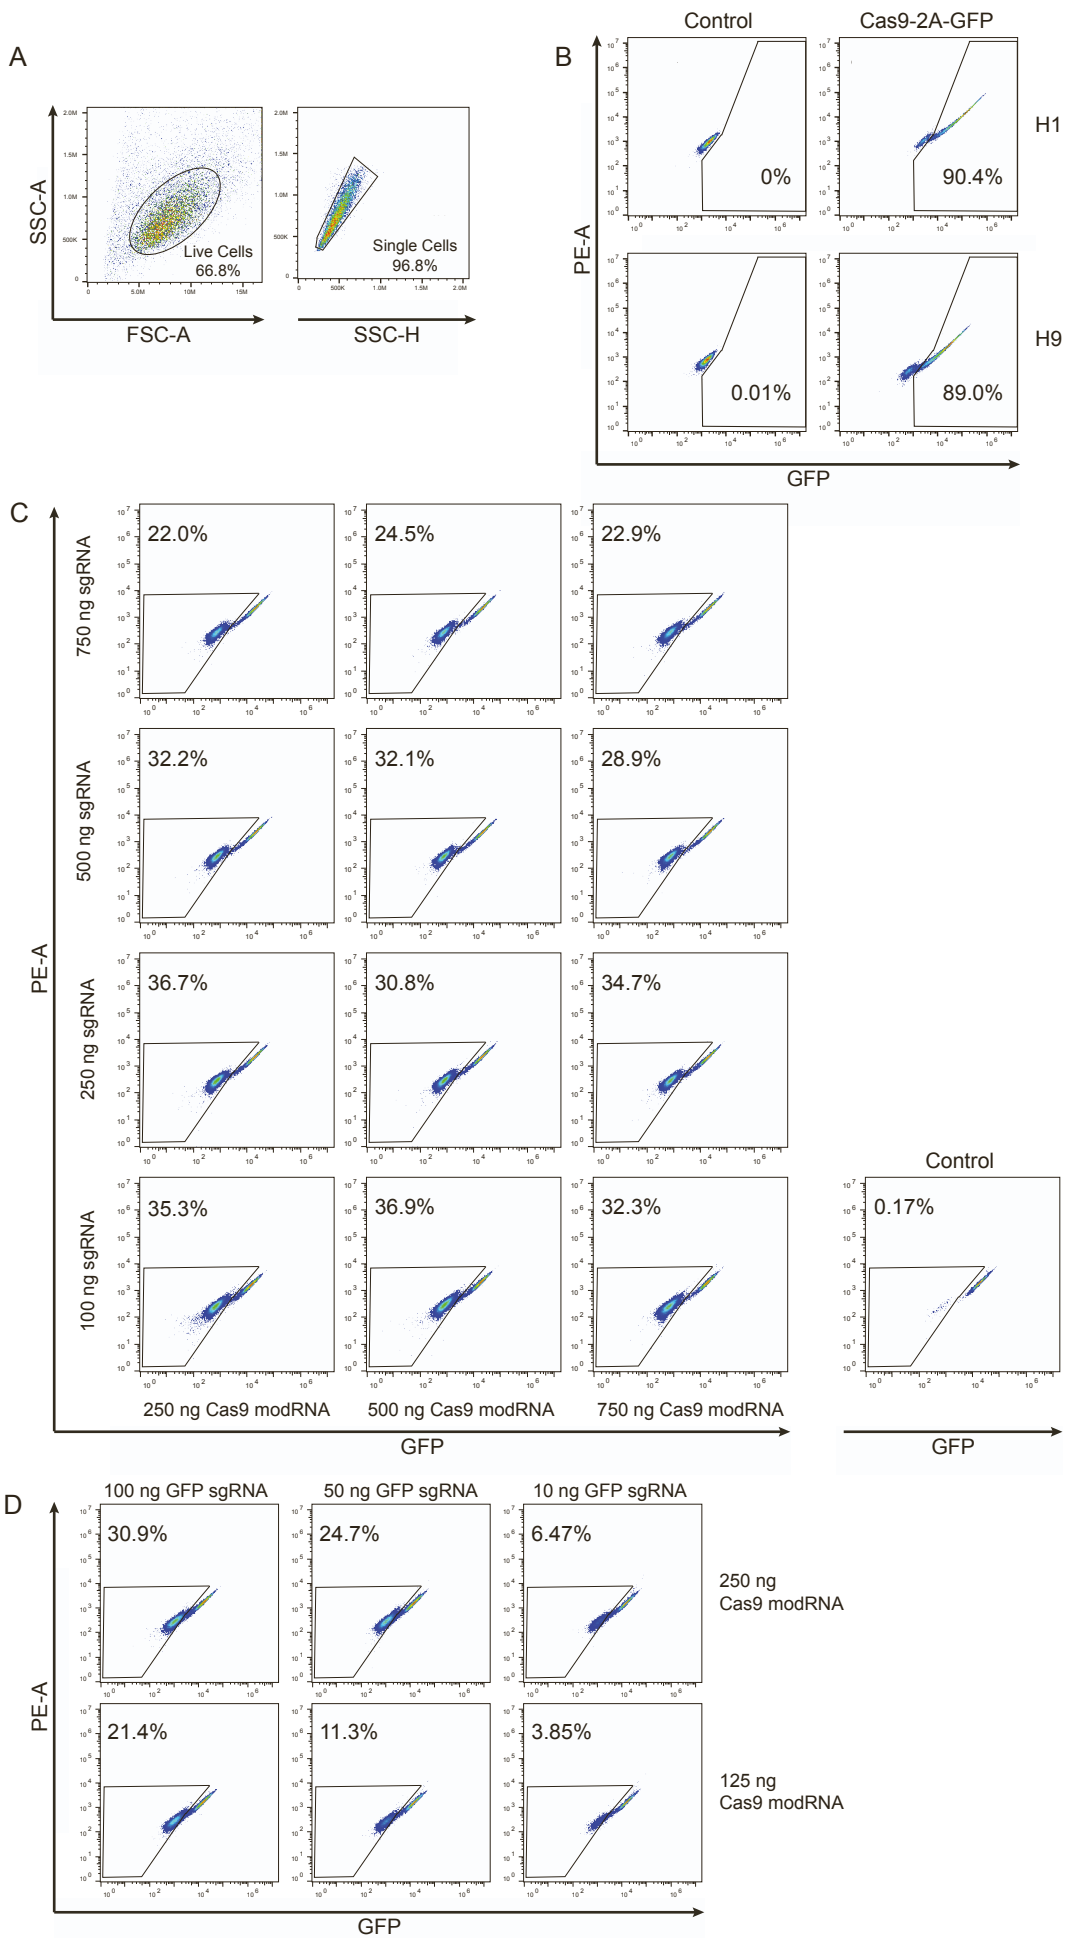

**Fig S1 Optimization of modRNA delivery for CRISPR mediated gene editing in hPSCs, Related to Fig. 1.**

(A) Representative gating strategy used for excluding dead cells and subsequent doublet discrimination for excluding high fluorescence events during flow cytometry analysis

(B) H1 and H9 cells were cultured on iMatrix-511 in mTeSR1 using a 24-well plate and transfected with Cas9GFP modRNA using Lipofectamine Stem Transfection Reagent (1:2 ratio). 24 hours later GFP expression was analyzed by flow cytometry.

(C and D) H1 OCT4-GFP cells were cultured on iMatrix-511 in mTeSR1 and transfected with different combinations of Cas9 modRNA and GFP sgRNA. On day 4, cells were collected and GFP expression was analyzed via flow cytometry.

(C) Flow cytometry plots for combinations of 750 ng, 500 ng, and 250 ng Cas9 modRNA with either 750 ng, 500 ng, 250 ng, or 100 ng GFP sgRNA.

(D) Flow cytometry plots for combinations of 250 ng and 125 ng Cas9 modRNA with either 100 ng, 50 ng, or 10 ng GFP sgRNA. Experiment was repeated three times and representative data were shown.

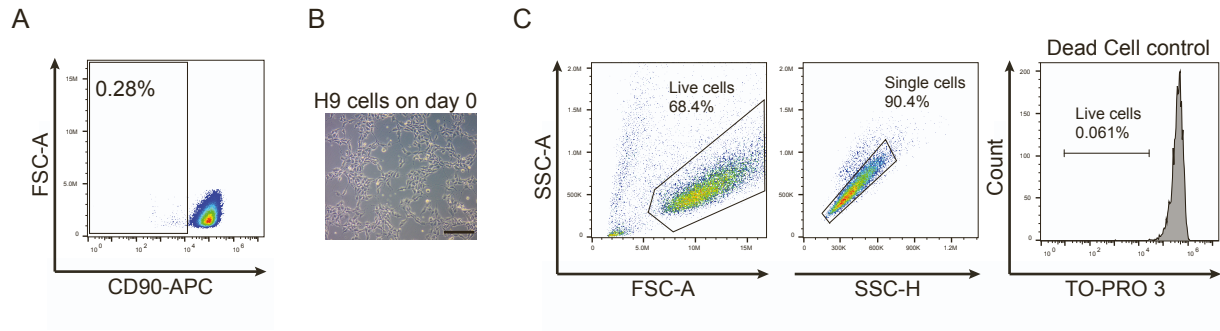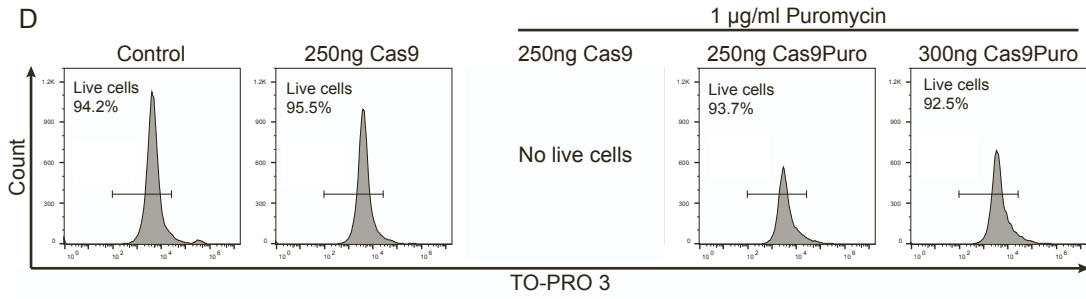

**Fig S2 Delivery of Cas9Puro modRNA in hPSCs, Related to Fig 2.**

(A) CD90 expression in untransfected H9 cells.

(B) Representative image of H9 cells on D0 prior to transfection with Cas9Puro modRNA (scale bar = 200  $\mu\text{m}$ ).

(C) Representative gating strategy for counting live cells after staining with TO-PRO 3 cell viability reagent.

(D) Representative flow cytometry plots for data summarized in Fig. 2D.

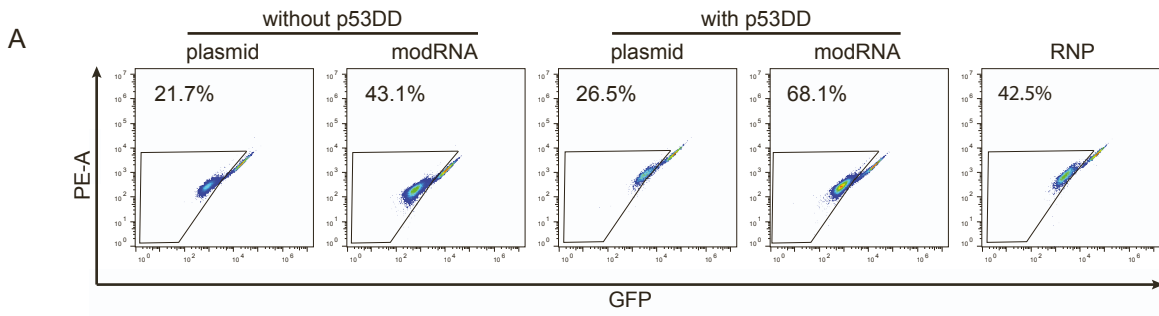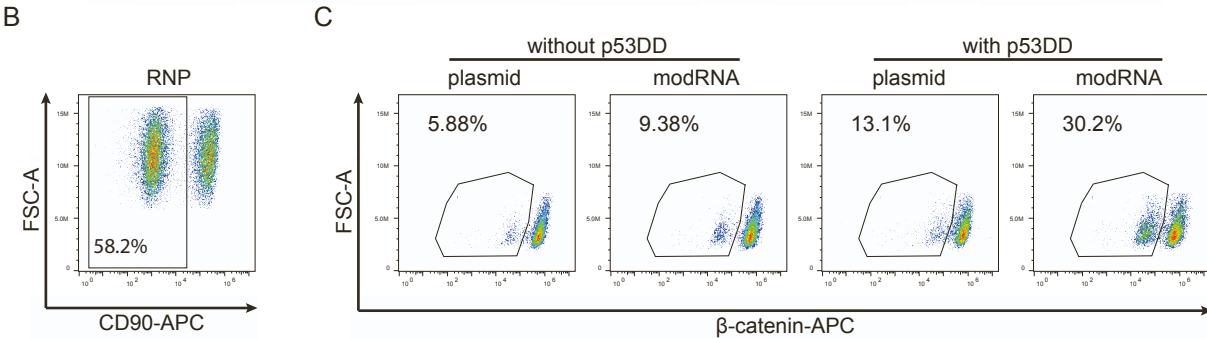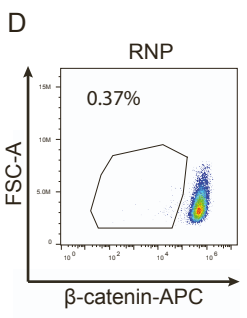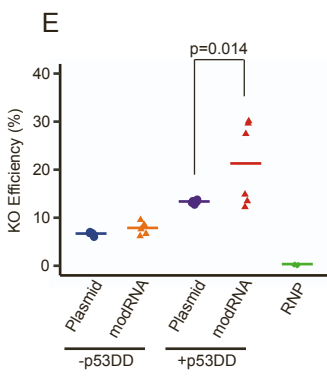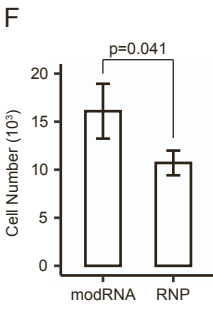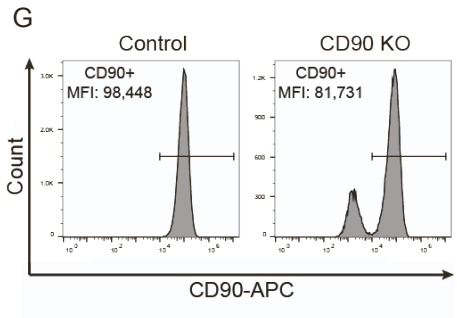

**H**

**Off-Target 1 (chr17:38470120):**  
 TGAATGACACCATGCAGCCCCGCCATGGGCCCTCGTCTGGACTGCCTCTTTC      *Wildtype*  
 TGAATGACACCATGCAGCCCCGCCATGGGCCCTCGTCTGGACTGCCTCTTTC      *H9CD90KO*

**Off-Target 2 (chr2:129557056):**  
 CAGAGCTGCAGTGCAGACGAGGGTTGGGCACCTCAGAGCTGCAGTGCAGACAG      *Wildtype*  
 CAGAGCTGCAGTGCAGACGAGGGTTGGGCACCTCAGAGCTGCAGTGCAGACAG      *H9CD90KO*

**Off-Target 3 (chr4:122959527):**  
 CTTTTATATGTTGTGCTCTGATGATTTTCCCTCTTCTGGACTGCCGCATAG      *Wildtype*  
 CTTTTATATGTTGTGCTCTGATGATTTTCCCTCTTCTGGACTGCCGCATAG      *H9CD90KO*

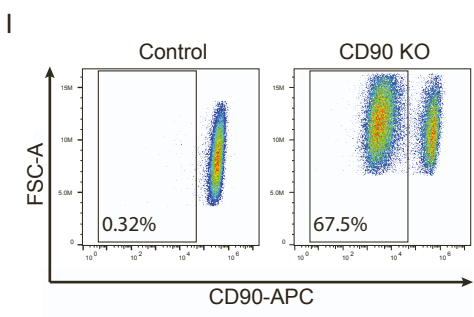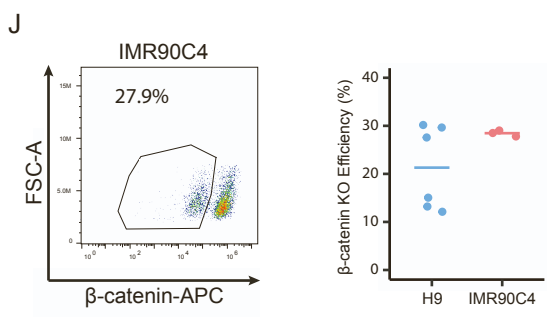

**Fig S3 Cas9 mediated gene KO with p53DD in hPSCs, Related to Fig 3.**

(A) Representative flow cytometry plots of GFP KO in H1 OCT4-GFP cells transiently transfected with plasmid DNA or modRNA with or without p53DD as well as RNP method.

(B) Representative flow cytometry plot of RNP mediated CD90 KO in H9 cells on day 5 post-transfection.

(C) Representative flow plots of  $\beta$ -catenin KO in H9 cells transiently transfected with either plasmid DNA or modRNA with or without p53DD. Cells were collected on day 5 post-transfection and  $\beta$ -catenin expression was analyzed via flow cytometry.

(D) Representative flow cytometry plot of RNP mediated  $\beta$ -catenin KO in H9 cells on day 5 post-transfection.

(E) Aggregated  $\beta$ -catenin KO efficiencies across multiple replicates and batches in H9 cells, comparing results between transient transfection of plasmid DNA and modRNA-based delivery with or without p53DD as well as RNP lipofection (Plasmid: n=6; modRNA: n=6; plasmid+p53DD: n=6; modRNA+p53DD: n=6; RNP: n=6; one-way ANOVA with post-hoc Tukey's test).

(F) H9 cells were cultured in iMatrix-511 with mTeSR1 and transfected with either Cas9 modRNA and CD90 sgRNA or Cas9 protein and CD90 sgRNA. On day 2, cells were collected and stained with TO-PRO 3 cell viability reagent before being counted using a flow cytometer (n=3; unpaired student's T-test).

(G) Flow cytometry analyses of CD90 expression in untransfected and transfected H9 cells with Cas9 modRNA and CD90 sgRNA.

(H) Off-target analysis of CD90 KO H9 cells generated using CRISPR modRNA cocktail with p53DD.

(I) Representative flow cytometry plot of CD90 KO in IMR90C4 cells using CRISPR modRNA cocktail with p53DD.

(J) IMR90C4 cells cultured on iMatrix-511 in mTeSR1 were transfected with Cas9Puro modRNA, CTNNB1 sgRNA, and p53DD modRNA. On day 5, cells were collected, and  $\beta$ -catenin expression was analyzed via flow cytometry. Representative flow cytometry plot and quantification (H9: n=6; IMR90C4: n=3).

A

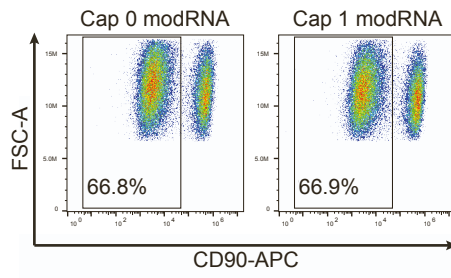

B

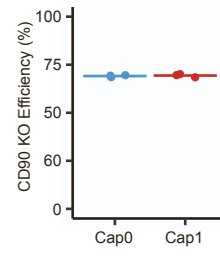



**Fig S4 Both cap 1 and cap 0 modRNA structures can mediate efficient genome editing in hPSCs, Related to Fig 3.**

IMR90C4 cells were cultured on iMatrix-511 in mTeSR1 using a 12-well plate and transfected with 600 ng Cas9Puro modRNA (Cap0 or Cap1), 200 ng CD90 sgRNA, and 200 ng p53DD modRNA. On day 5, cells were collected and CD90 expression was analyzed by flow cytometry.

(A) Representative flow cytometry plot.

(B) Quantification of flow cytometry results from day 5 cells (n=3).

**Table S1:** Oligonucleotides used in this paper for gene cloning, sequencing editing sites, and gRNA sequences.

| <b>Gene Cloning into modRNAc0 vector</b>    |                                                                                                         |
|---------------------------------------------|---------------------------------------------------------------------------------------------------------|
| Cas9                                        | Forward: CATGGCATGCGAATTCATGGACAAGAAGTACTCCATTGGGC<br>Reverse: AAGCGAGCTCACTAGTTTACTCTCCACCGAGCTGAGAG   |
| Cas9-2A-Puro                                | Forward: CATGGCATGCGAATTCGCCACCATGGATTACAAAGACG<br>Reverse: AAGCGAGCTCACTAGTTCAGGCACCGGGCTTGCG          |
| Cas9-2A-GFP                                 | Forward: CATGGCATGCGAATTCATGGACAAGAAGTACTCCATTGGGC<br>Reverse: AAGCGAGCTCACTAGTTTACTTGTACAGCTCGTCCATGCC |
| p53DD                                       | Forward: CATGGCATGCGAATTCGCCACCATGACTGCCATGG<br>Reverse: AAGCGAGCTCACTAGTTCAGTCTGAGTCAGGCCCC            |
| ABE8e-GFP                                   | Forward: CATGGCATGCGAATTCGCCACCATGAAACGGACAGC<br>Reverse: AAGCGAGCTCACTAGTTTATACCTTACGCTTCTTCTTTGGC     |
| <b>Sequencing primers for editing sites</b> |                                                                                                         |
| CD90 On-target                              | Forward: ATCTCTCCACTTCAGGTGGGT<br>Reverse: TGTATTTGCTGGTGAAGTTGGT                                       |
| CD90 Off-target 1                           | Forward: AGAGAGGGTGTGTCAGGGAGGT<br>Reverse: CTAAAAAGCCGCGAAGACAG                                        |
| CD90 Off-target 2                           | Forward: CTCACAGGCATTACAAGGA<br>Reverse: GCAGGAGTCACTGTCTGCAC                                           |
| CD90 Off-target 3                           | Forward: TTGTGGACCTGCATGTTTGT<br>Reverse: CACAAACACTACAGAGGTTTTGTATTC                                   |
| B2M splice donor site                       | Forward: GCGTTTAATATAAGTGGAGGCG<br>Reverse: CACCAAGGAGAAGTGGAGAAG                                       |
| <b>gRNA sequences</b>                       |                                                                                                         |
| GFP sgRNA                                   | GGGCGAGGAGCTGTTACCG                                                                                     |
| CD90 sgRNA-1                                | CATGGCAGCAGTCCAGACGA                                                                                    |
| CD90 sgRNA-2                                | GCCTTCACTAGCAAGGACGA                                                                                    |
| B2M sgRNA                                   | ACTCACGCTGGATAGCCTCC                                                                                    |
| β-catenin sgRNA                             | GAAACAGCTCGTTGTACCGC                                                                                    |

**Data S1:** Full sequence and map of plasmid XLoneV3-ABE8e. Related to the STAR Methods.

**Full sequence (TRE3G promoter, ABE8e, 2A, EGFP; Tet-On 3G, EF1a core promoter):**

atcacctcagtttactccctatcagtgatagagaacgtatgaagagtttactccctatcagtgatagagaacgtatgcagactttactccctatcagtgatagagaacgtata  
aggagtttactccctatcagtgatagagaacgtatgaccagtttactccctatcagtgatagagaacgtatctacagtttactccctatcagtgatagagaacgtatatccagtt  
tactccctatcagtgatagagaacgtataagcttctgtatgaaaccaggcgcctataaaagagtgctgatttttgagtaaacctcaatccacaacacttttctttatacca  
actttccgtaccacttctaccctcgtaaaggtaccgcccaccatgaaacggacagccgacggaagcaggtcagtcaccaagaagaagcggaaagtctctgaggtg  
gagtttccacagtgactgagatgacatgccctgaccctggccaagaggcagggatgagagggaggtgcctgtgggagccgtgctggtgctgaacaatagagt  
gatcggcagggctggaacagagccatcggcctgcacgaccaacagccatgccaaattatggcctgagacagggcggcctggtcagcagaactacagactg  
atgacgccaccctgtacgtgacattcagccttgcgtgatgtgcgccggcctatgaccacttaggatcggccgctggtggttggatggagaattctaaaagagg  
cgccgcaggctcctgatgaacgtgctgaactacccggcatgaatcaccgctgcgaaattaccgagggaatcctggcagatgaatgtccgcccctgctgtgcgattt  
atcggatgcttagacaggtgtcaatgctcagaagaaggccagagctccatcaactccggaggatctagcggaggctcctctggtctgagacacctggcacaagcg  
agagcgcaaacctgaaagcagcggggcagcagcggggggtcagacaagaagtacagcatcggcctggccatcggcaccactctgtgggctggcggctgatca  
ccgacgagtacaaggtgccagcaagaattcaagtgctgggcaacaccagccgacagcatcaagaagaacctgatcggagccctgctgtcagacggcga  
aacagccgaggccaccggctgaagagaaccgccagaagaagataccagacggaagaaccggatctgctatctgcaagagatctcagcaacgagatggccaa  
ggtggacgacagcttctccacagactggaagagtccttctggtggaagaggataagaagcagcagcggcaccctctcggcaacatcgtggacgaggtggccta  
ccagagaagtacccaccttaccactgagaagaactggtggacagcaccgacaaggcggactcggctgatctatctggccctggccacatgatcaagtt  
ccggggccacttctgatcaggggcagctgaacccgacaacagcagctggaagaagctgttcatccagctggtgacacctacaaccagctgttcgaggaaaacc  
ccatcaacgccagcggcgtggagccaaggccatcctgtctgccagactgagcaagagcagacggctgaaaatctgatcggcagctgcccggcgagaaga  
atggcctgttcgaaacctgattgccctgagcctggcctgaccccaactcaaggaacttcgacctggcggaggtgccaactgcagctgagcaagacaccta  
cgacgacgacctggacaacctgctggccagatcggcagcagctacccgacctgttctggccgcaagaacctgtccgacgccatctctgagcagatcctgag  
agtgaacaccgagatcaccaaggccccctgagcgcctctatgatcaagagatcagcagcaccaccaggacctgacctgctgaaagctctctgtcggcagcagc  
tgccctgagaagtacaagagattttctgaccagagaagaacggctacggcgtacattgacggcggagccagcaggaagagttctacaagttcatcaagccat

cctggaaaagatggacggcaccgaggaactgctcgtgaagctgaacagagagacctgctcgggaagcagcggaccttcgacaacggcagcatccccaccagat  
ccacctgggagagctgcacgccattctcggcgccaggaagatffffaccattcctgaaggacaaccggaaaagatcagaaatcctgacctccgcatcccctac  
tacgtggccctctgcccaggggaaacagcagattcgcctggatgaccagaaagagcgggaaaccatcacccctggaactcagagaaagtgggacaagggcg  
ctccgccagagctcatcgagcggatgaccaactcagaaactgcccacagaaaggtgctgccaagcacagcctgctgtacgagtactcaccgtgataac  
gagctgacaaagtgaatactgaccgaggaatgagaaagcccctctgagcggcgagcagaaaaaggccatcgtggacctgctgttaagaccaaccgga  
aagtaccgtgaagcagctgaagaggactactcaagaaaatcagtgctcctgactccgtgaaatcctcggcgtggaagatcggttaacgctccctgggcacata  
ccacgatctgctgaaaattatcaaggacaaggactcctggacaatgaggaaaacgaggacattctggaagatactgctgacacctgacctgttgaggacagagaga  
tgatcagggaacggctgaaaacctatgccacctgtcagcacaagtgatgaagcagctgaagcggcgagatacaccggctggggcaggctgagccggaagct  
gatcaacggcatccgggacaagcagfccggcaagacaatcctggattctgaagtcgacggcctcggcaacagaaactcatgacgtgatccacgacgacgct  
gaccttaaaaggacatccagaagcccagggtgcccggcaggcgatagcctgacagagacattgccaatctggccggcagccccgccattaagaagggcatcc  
tgacagacagtaaggtggtagacgctcgtgaaagtgatggccggcacaagcccggagaacatcgtgatcgaatggccagagagaaccagaccaccagaagg  
gacagaagaacagccgcgagagaatgaagcggatcgaagaggcacaagagctggcgagccagatcctgaaagaacaccccgtgaaaaaccccagctgcag  
aacgagaagctgtacctgtactacctgcagaatggcgggatagtacgtggaccaggaactggacatcaaccggctgcccactacgatgtggaccatactgctc  
agagcttctgaaggacgactccatcgacaacaaggtgctgaccagaagcgacaagaaccggggcaagagcgacaacgtgcccctcgaagaggtcgtgaaagat  
gaagaactactggcgacgtgctgaacgcaagctgattaccagagaaggtcgaacatcgaccaagccgagagagggcgctgagcgaactggataaggcc  
ggcttcatcaagagacagctggtgaaaccggcagatcacaagcagctggcacagatcctggactccggatgaactaagtagcagagaatgacaagctgat  
ccgggaagtgaagtgatcacctgaaagtcgaagctggtgctcgtgattccggaaaggttccagtttcaaaagtgcgcgagatcaaaactaccaccagcccacgac  
gcctactgacgccctgctgggaaccgcccctgatcaaaaagtaccctaagctggaagcagagttctgacggcactacaaggtgtacgctgcccgaagatgatc  
gccaaagagcagcaggaatcggcaaggctaccgcaagctctctacacacatcatgaacttttcaagaccgagattaccctggccaaccggcagatccgga  
agcgcctctgacgagacaaccggcgaaccggggagatcgtggtggataagggccggatcttccaccctgctggaaaggtgagctgaccccgaatgaaatc  
gtgaaaagaccgaggtgcagacagcggcttctcagcaagagctctctcggcaagaggaacagcgataagctgatcgcagaaagaagactgggaccctaaga  
agtacggcggctcgcagccccaccgtggcctattctgctgctggtggcgaaggtgaaaagggaagtcgaagaaactgaagagtgtaagagctgctgggg  
atcacatcatgaaaagaagcagctcagagaatccatcgacttctggaagccaaggctacaagaagtgaaaaaggacctgatcatcaagctgcttaagtact  
ccctgtcagctggaaacggccggaagagaatgctgcccctcggcgaactcagaagggaaacgaactggccctgcccctcaaatatgtaactcctgtacct  
ggccagccactatgagaagctgaaggctccccgaggataatgagcagaacagctgttgggaacagcacaagcactacctggacgagatcagcagatca  
gcgagtttccaagagagtgatcctggccagcgtaatctggacaaggtgctgcccctacaacaagcaccgggataagcccatacagagcagggcgaatata  
tccacctgttacctgaccaatctgggagcccctgcccctcaagcttctgacaccaccatcgaccggaagaggtacaccagcacaagaggtgctggagccac  
cctgatccaccagacatcaccggcctgacgagacacggatcgactgtctcagctgggaggtgactctggcggctcaaaaagaaccggcagcgcgcaatcg  
agcccaagaagaagagaaagctgtagcggcagcggcggcacaactcctcctgtgaaacaagcaggggatgctgaagagaatccggggccaatggtgagcaa  
ggcgaggaagctgtaccgggggtggtgcccactcctgctgagctggacggcgacgtaaacggccacaagttcagcgtgctccggcgagggcgagggcagtcac  
ctacggcaagctgacctgaaagttcatctgaccaccggcaagctgcccgtgcccctggcccacctgtagaccacctgacctacggcgtgacgtgcttaccgctac  
cccgaccacatgaagcagcagacttctcaagtcgcatcccgaaggctacgtccaggagcgcaccatcttcaaggacgacggcaactacaagaccgccc  
gaggtgaagttcagggcgacacctgtgaaaccgcatcgactgaagggcatcgactcaaggagggacggcaacatcctggggcacaagctggagtaactaca  
acagccacaacgtctatcatgcccgacaagcagaagaacggcatcaaggtgaaactcaagatccgccacaacatcaggagcggcagcgtgacgtcggcaccac  
taccagcagaacacccccatcggcgacggccccgtgctgctgcccgaaccactacctgagcaccagctccgccctgagcaaaagacccaacgagaagcgcgatc  
acatggtcctgctggagttcgtgaccgccgggatcactctcggcatgacgagctgacaagccaagaagaagcgtgaaggtataagtaagaatccgat  
catattcaataaccactagtagaccacctcccctgagctgaagctggacagccaatgacgggtaagagagtgacattttactaactaagacagggagggcctcag  
agctactgctaatacgaagcgggtaaaagtataaaatgatacactcaacctaagacagggcgagctccgagggattgagatccagacatgataagatactga  
tgagttggacaaccaaactagaatgacgtgaaaaaatgcttattgtgaaattgtgatgctattgcttattgtaaccattataagctgcaataaacaagttgatact  
ataacaagaaaatataataaagtatcacgtaagtagaatgaaatacaataatctgtagtgaatctaaagtcacgtaaaagataatcatgctcattt  
gactcagcggctgtatagttcaaaatcagtgacacttaccgattgacaagcagcctcagggagctccaagcggcgactgagatgcttaaatgcacagcagcg  
attcgcctatttagaaagagagcaatattcaagaatgcatgctcaatttacgcagactacttctagggtaagaatcactggcctgctttacaacgtcgtgact  
gggaaaacctggcgtfaccacaacttaatgccttgcagcacatcccccttgcagcagctggcgtaatagcgaagagggcccaccgacgcccctccaacagctgcg  
cagcctgaatggcgaatggcgctgatcggtatttctccttaccgcatctgtgctggtatttccacaccgcatatggtgactctcagtaaatcgtcctgatggcgcatagtt  
aagccagccccgaccccccaacaccgctgacgcgctgacggcgtgctgctcggcctccagcagccttacagacaagctgtgaccgtctccgggagctgcatgtg  
tcagaggtttaccgctcaccgaaacgcgcgagacgaaagggcctcgtgatacgcctattttataggttaatgcatgataaatggttcttagacgtcaggtggca  
ctttcggggaatgtgcgcggaaccctattgttttttctaataactcaaatatgatacgcctcatgagacaataaccctgataaatgcttaataatgaaaaagga  
agagtagtagtattcaacattccgtgctgcccctattccctttttgcccattttgcttctgttttctcaccagaaacgctggtgaaagtaaaagatgctgaagatcag  
tgggtgacgagtggttaccatgaaactggatcacaacgggtaagatcctgagagtttcccccgaagacgtttccaatgatgacactttaaagtctctatgt  
ggcgggtattaccgtatgacggcggaagcgaactggctgcgcgatacactattctcagaatgactggttgagtactaccagtcacagaaaagcatcttacg  
gatggcatgacagtaagagaattatcgatgctgccataacctgagtgataaactgcggcaacttactctgacaacgatcggaggaccgaagagctaacccgtt  
ttgcacaacatgggggatcatgtaactgcctgatcgttgggaaccggagctgaatgaagccatacacaacgacgagcgtgacaccagatgctgtgcaatggca  
acaacgttgcgaacttaactggcgaacttactctagctcccggcaacaatfaatagactggatggaggggataaaagttcagggaccacttctgctcggcc  
cttccggctgctgtttattgctgataaatctggagccggtgagcgtgggtctcgcggatcattgagcactggggccagatgtaagccctcccgtatctgagttatct  
acacagcggggagtcaggcaactatggatgaacgaaatagacagatcgtgagataggtgctcactgattaagcattgtaactgtcagaccaagttactcatatatac  
ttagattgattaaaactcatttttaattaaaaggatcaggtgaagatccttttgataatctcatgaccaaaatcccctaactgagtttcttccactgagcgtcagacc

gtagaaaagatcaaggatcttctgagatcctttttctgcgcgtaactgctgcttgcacacaaaaaacaccgctaccagcgggtgtttgttgcggatcaagagcta  
ccaactcttttccgaaggtaactggctcagcagagcgcagataccaataactgttcttagtgtagccgtagttaggccaccactcaagaactctgtgaccgctac  
atacctcgtctgtaactcctgttaccagtggtcgtcgcagtgccgataagtcgtcttaccgggttgactcaagacgatgtaccggataaggcgcagcggcggg  
ctgaacggggggtcgtgcacacagcccagcttgagcgaacgactacaccgaactgagatacctacgcgtgagctatgagaaagcgcacgctcccgaaggga  
gaaaggcggacaggtatccgtaagcggcagggcggaaacaggagagcgcacgagggagctccaggggaaacgctggtatcttatagtcctgctgggttcgc  
cacctcgtactgagcgtcgttttctgagctcgtcaggggggcggagcctatggaaaaacgccagcaacgcggccttttacggtcctggcctttctggcctttgc  
tcacatgttcttctcgttatcccctgattctgtgataaccgtattaccgctttgagtgagctgataccgctcgcgcagccgaacgaccgagcgcagcagctgagtg  
agcgagggaagcgaagagcgcacaatcgaacccgctctcccgcgcttgccgattcattaatgacagctggcacgacaggttcccactggaaagcgggca  
gtgagcgaacgcaattaatgtgagtagctcactcattaggcaccggctttacactttatgcttccggctcgtatgttgtggaattgtgagcggataacaattcaca  
caggaaacagctatgaccatgattacgccaaggtcgaactaaccttagaaaataatcatattgtgacgtacgttaaagataatcatgctgtaaaattgacgcatgttttacc  
ggtctgtatcagaggttatttataattgaatagataattaagtttattatattacactacatactaataataaattcaacaacaatttattatgtttatttataaaaaaaa  
caaaaactcaaaatttctataaagtaacaaaacttttagcagtgaaaaaatgcttatttgtgaaattgtgatgctattgcttatttgaaccattataagctgcaataaaca  
agtaactaaacgggcccctagatcaggcaccgggcttgcgggctatgcaccaggtgcgcgctcctcgggcacctcgcagctcggcgggtgacggtgaagccgagcc  
gctcgtagaaggggaggttgcggggcgcggaggtctccaggaagggcggcaccggcgcgctcggccgctccactcggggagcagcagcggcgtgcccag  
acccttgcctgggtgctggggcagacgccgaggtggccaggaaccagcgggctccttgggcccgtgcccgcaggaagccttccatctgttctgctgccc  
agccgggaaccgctcaactggccatgcgcggccgatctcggcgaacaccgccccgcttcgacgctcctccggcgtggtccagaccgcccagcggcgtcgt  
ccgacccacaccttccgatgctgagcccagcgcgctgagggaaggttcttcagctcgtgacccgctcgtatgtggcgggtccggatcagcgggtgctgcccgtg  
gcccgggtatgctggcgaacgcggcggagggctgctacggccctggggagcgtcgcgggtggcagggcaccgctggccttctactcgtatcctcagccta  
ggcggggaattcctccacgtaccgcatgttagaagacttctcctcctcggcctcggcctcggcgggagcaggtcaaaaggtcaaaagcgtcagcagcagca  
gcatacaagggtcaaaagcgtcaaaagcgtcggcggagcagctcaaaagcgtcaaaagcgtcggcggcggcggcggcggcggcggcggcggcggcggcggc  
cacatagattagttccaggccgaaaagggaaggcaggttcggctcctcggcgtcgaacagcctaattgcttctcagaagtgggggcatagaatcggtggtgaggtgct  
ctcttctcttctgacttctgctccttctccaatcgcagcccagtgtaaagtgccacggcggagagcgtacagtgcttccaggggagaagccttctgta  
cacaggaaagcgcagctgatttccagggttctgactgttctctgttggcgggtgccgagatgcactttagcccgtcgcgatgtgagaggagagcagcagcggatga  
cttggcgttctccgagaaagcttccatgactcgccttccaggggcagcaggtggtatgatcctgtccagcctcgttggcagggcagcagcagggcccgt  
gttcttcaagcagctacaggttaggctcctcaactcccagcttttagcaggttcttctgctcagccttcgataccgactccattgagtaattccagagcagagttat  
gacttctcttctcagctagacatcttctcctccttcttgaatccatgttggcggatcccgcgtcacgacactgtgttctggcggcaaaccttgcgaaaaaga  
acgttcacggcactactgacttatatacgttctccccaccctcgggaaaaagcggagccagctacacgacatcacttcccagttaccccggccaccttctag  
gcaccggtcaattgccaccctcccccaactctcgggactgtggcgatgtgcctcgtcccactgacgggcaccggagccactcagtggaatt

**Map:**

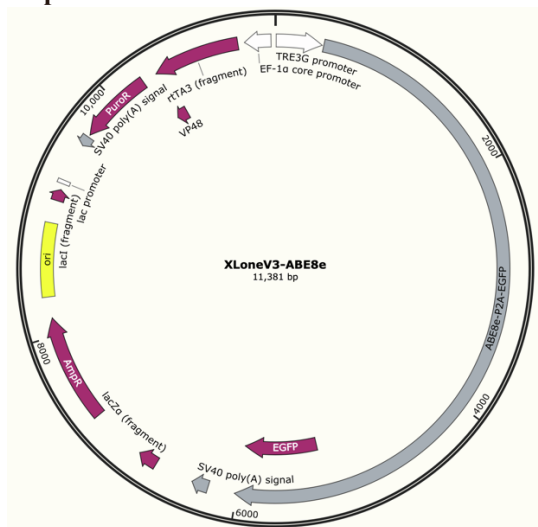

Supplement: mmc1.pdf [file mmc1.pdf]
